# Supplementary material
Source: PubMed Central journal article supplement (PMC6584619)
Supplement: EMS83388-supplement-Supplementary_Materials.pdf [file EMS83388-supplement-Supplementary_Materials.pdf]

## Supplementary Materials

### Supplementary Figure 1

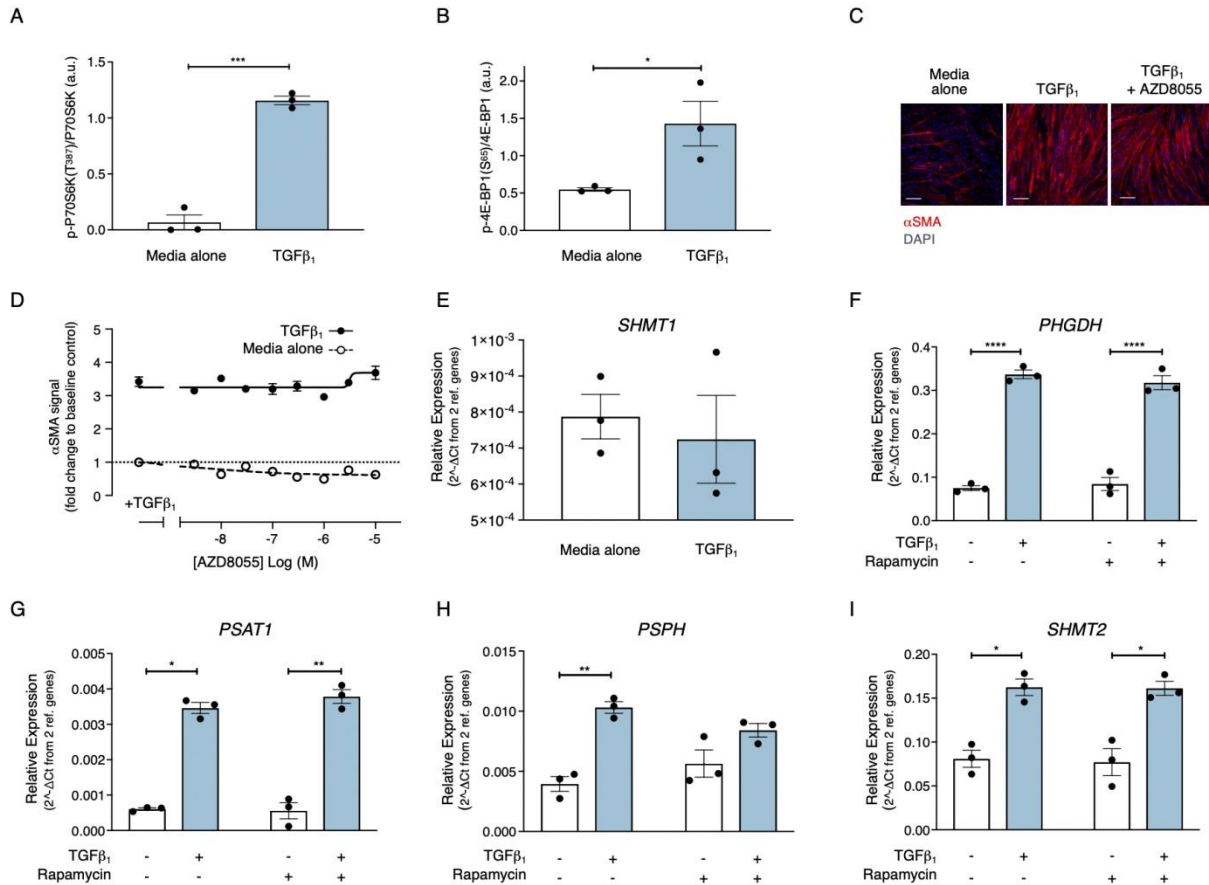

**fig. S1. TGF-β<sub>1</sub> induced α-SMA expression is insensitive to AZD8055 treatment and the TGF-β<sub>1</sub> induced serine-glycine biosynthetic pathway is insensitive to rapamycin treatment**

(A-B) Confluent pHLFs were incubated with or without TGF-β<sub>1</sub> for 1 hour followed by immunoblotting and densitometric quantification of p-p70S6K relative to p70S6k (Thr<sup>389</sup>)(A) and p-4E-BP1 relative to 4E-BP1(Ser<sup>65</sup>)(B), N=3 biological replicates and data are representative of 3 independent experiments. (C-D) Confluent pHLFs were pre-incubated with vehicle (DMSO) or increasing concentrations of AZD8055 and stimulated for 48 hours with TGF-β<sub>1</sub>. α-SMA stress fiber formation was assessed by high content imaging. Immunofluorescence images are shown as indicated (Scale bar=100μm) (C) and (D) N=3 biological replicates and data are representative of 3 independent experiments. (E) *SHMT1* relative mRNA abundance was measured by RT-qPCR at 24 hours following incubation with media plus TGF-β<sub>1</sub> or media alone (N=3 biological replicates). (F-I) Confluent pHLFs were

pre-incubated with rapamycin or vehicle (DMSO) prior to TGF- $\beta_1$  incubation or media alone. After 24 hours, the relative mRNA abundance of *PHGDH*, *PSAT1*, *PSPH* and *SHMT2* were measured by RT-qPCR (N=3 biological replicates and data are representative of 3 independent experiments). Differences between groups were evaluated by unpaired t-test (A,B,E) or two-way ANOVA (F-I) with Tukey post-hoc testing. \*p<0.05, \*\*p<0.01, \*\*\*p<0.001, \*\*\*\*p< 0.0001.

## Supplementary Figure 2

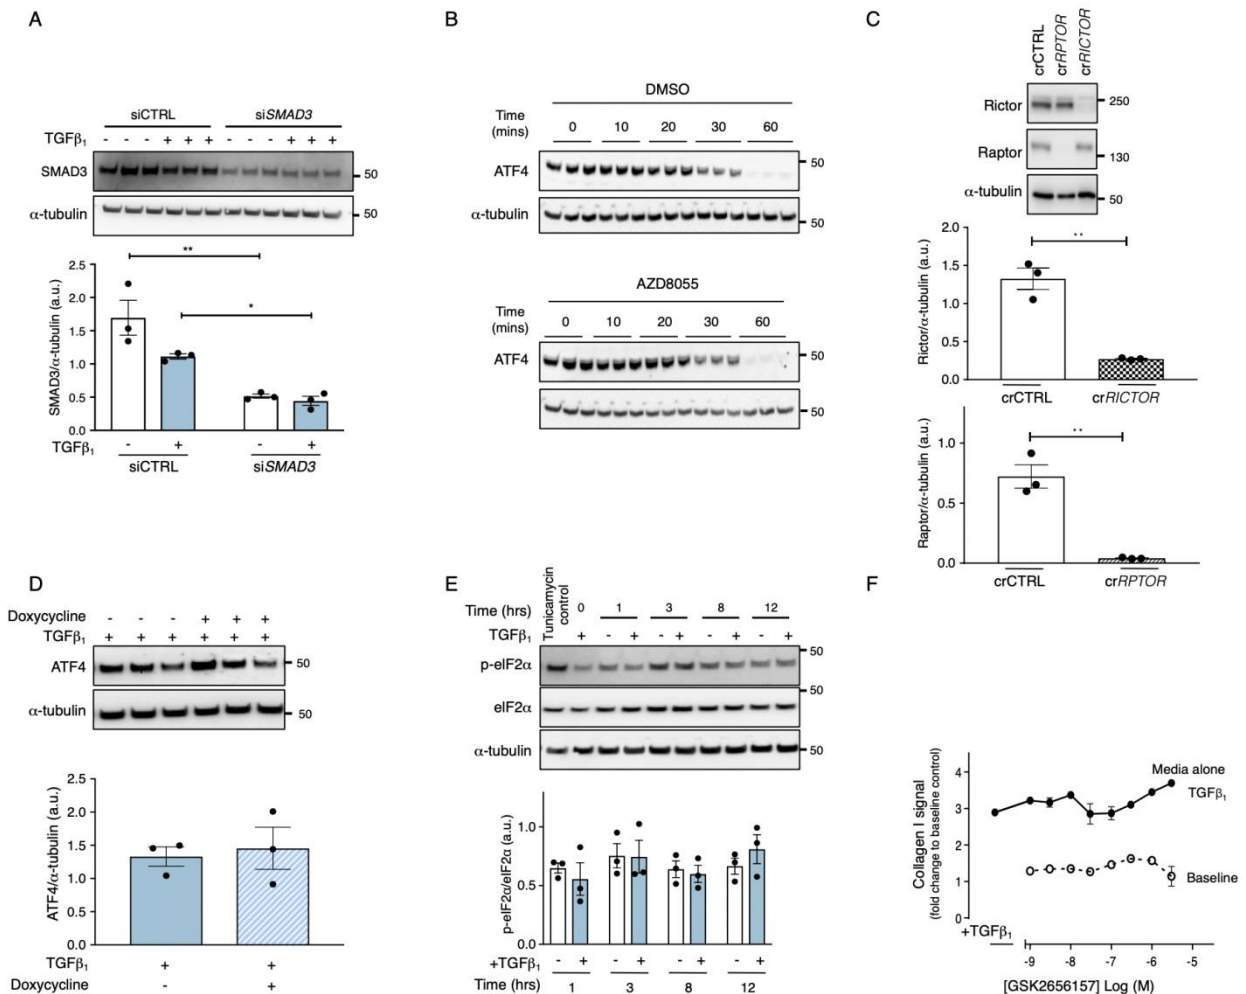

**fig. S2. Demonstration of successful gene and protein manipulation and evidence that TGF-β<sub>1</sub> stimulation in fibroblasts is not associated with PERK activation**

(A) Confluent pHLFs were transfected with scrambled control siRNA (siCTRL) or Smad3 siRNA (siSMAD3) before incubation with or without TGF-β<sub>1</sub> for 24 hours. Representative immunoblot and densitometric quantification for Smad3 are shown (N=3 biological replicates). (B) Confluent pHLFs were treated with TGF-β<sub>1</sub> for 13 hours and lactimidomycin was added followed by vehicle (DMSO) or AZD8055. Immunoblotting for ATF4 and α-tubulin was performed at indicated time points over the subsequent hour. (C) pHLFs were modified by CRISPR-Cas9 gene editing of *RPTOR* or *RICTOR* before being incubated in media alone for 24 hours. Immunoblot and densitometric quantification of Raptor and Rictor are shown (N=3 biological replicates). (D) Confluent pHLFs were treated with doxycycline or media alone for 24 hours prior to TGF-β<sub>1</sub> stimulation. Immunoblot for ATF4 and densitometric quantification were performed at 24 hours (N=3 biological replicates). (E)

Confluent pHLFs were incubated with or without TGF- $\beta_1$  and immunoblotting and densitometric quantification for phosphorylated p-eIF2 $\alpha$  and total-eIF2 $\alpha$  were performed at indicated time points. Tunicamycin was added as a positive control and lysates collected at 12 hours post TGF- $\beta_1$  stimulation (N=3 biological replicates). **(F)** Confluent pHLFs were pre-incubated with vehicle (DMSO) or the PERK inhibitor GSK2656157 and stimulated for 48 hours with or without TGF- $\beta_1$  and collagen deposition assessed by high content imaging. N=3 biological replicates per condition and data are representative of 3 independent experiments. Difference between groups were assessed by two-way ANOVA (A,E) with Tukey post-hoc test or unpaired T-test (C,D). \*p<0.05, \*\*p<0.01, \*\*\*p< 0.001, \*\*\*\*p< 0.0001.

## Supplementary Figure 3

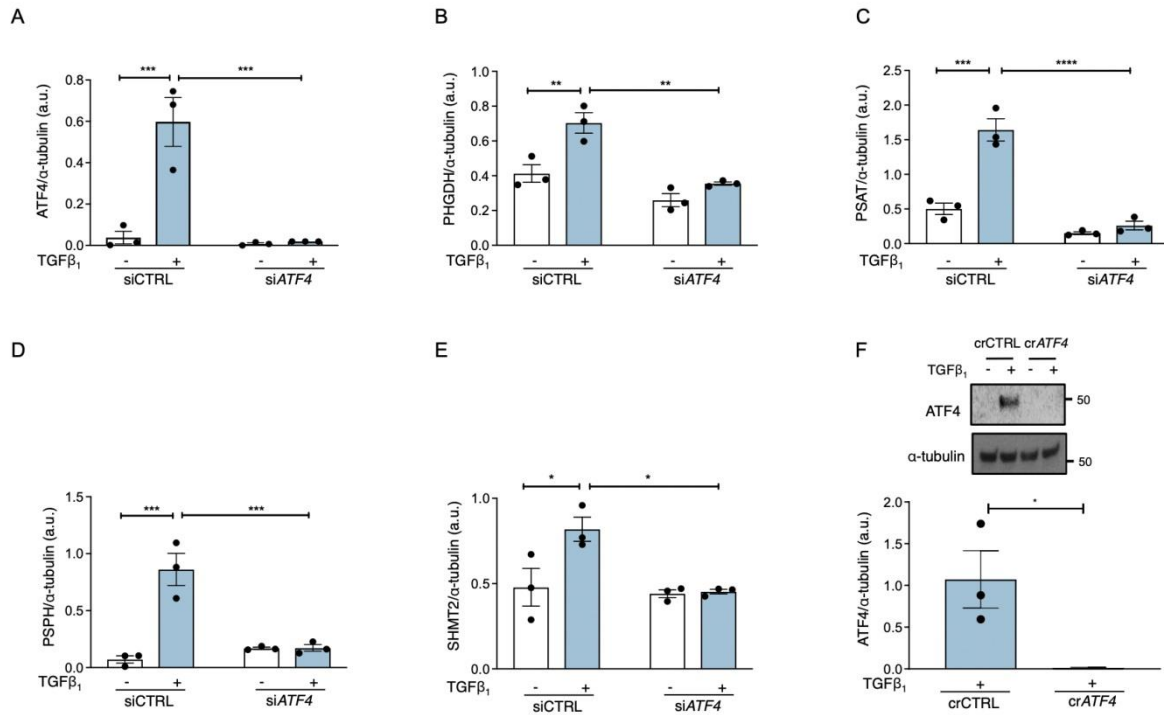

**fig. S3 ATF4 knockdown abrogates the TGF-β<sub>1</sub>-induced increase in glycine biosynthesis enzyme protein production.**

Confluent PHLFs were transfected with scrambled control siRNA (siCTRL) or ATF4 siRNA (siATF4) were incubated with or without TGF-β<sub>1</sub> for 24 hours. Immunoblotting performed and densitometric quantification for ATF4(A), PHGDH(B), PSAT1(C), PSPH(D) and SHMT2(E) are presented (N=3 biological replicates). (F) Confluent wildtype and ATF4<sup>-/-</sup> crisped PHLFs were incubated with or without TGF-β<sub>1</sub>. Representative immunoblotting and densitometric quantification for ATF4 are shown at 24 hours (N=3 biological replicates). Difference between groups were assessed by two-way ANOVA (A-E) with Tukey post-hoc test or unpaired T-test (F). \*p<0.05, \*\*p<0.01, \*\*\*p< 0.001, \*\*\*\*p< 0.0001.

## Supplementary Figure 4

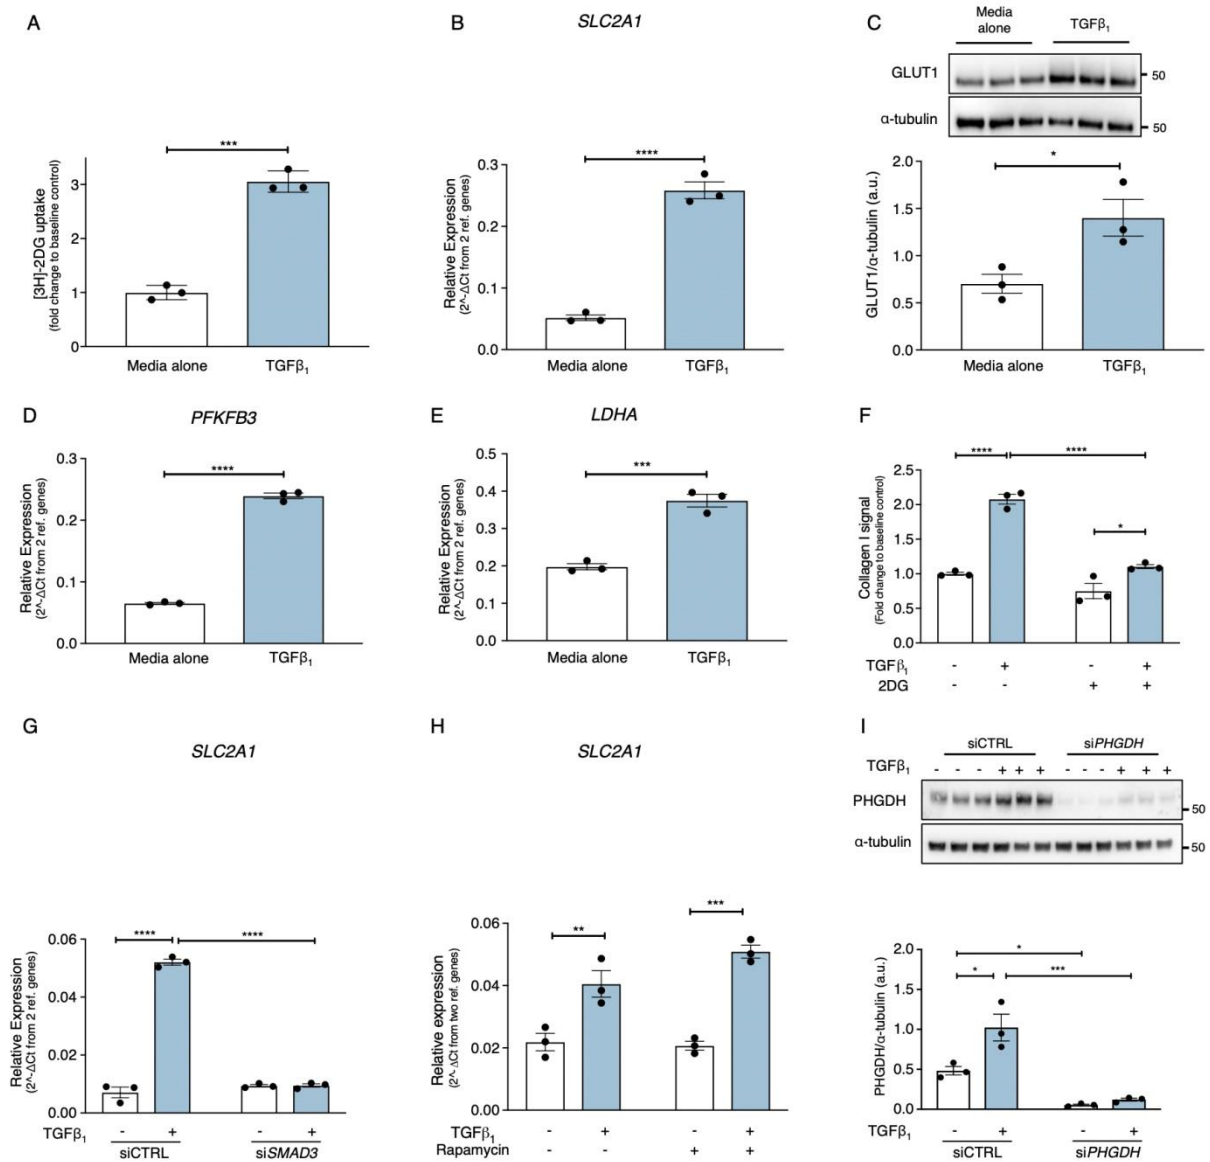

**fig. S4. TGF-β<sub>1</sub> increases glucose uptake, *SLC2A1*/GLUT1 and glycolytic enzyme expression**

(A) Confluent pHLFs were incubated with or without TGF-β<sub>1</sub> for 24 hours and <sup>3</sup>H-2DG uptake was measured (N=3 biological replicates and data are representative of 3 independent experiments). (B-E) Confluent pHLFs were incubated with or without TGF-β<sub>1</sub> and (B) *SLC2A1* relative mRNA abundance (24 hours), (C) GLUT1 protein abundance (24 hours), (D) *PFKFB3* (3 hours) and (E) *LDHA* (24 hours) relative mRNA abundance were measured (N=3 biological replicates). (F) Confluent pHLFs were incubated in the presence of 2-deoxyglucose and incubated for 48 hours with or without TGF-β<sub>1</sub>. Collagen deposition at 48 hours was assessed by high content imaging. N=3 biological replicates per condition and data are representative of 3 independent experiments. (G) Confluent pHLFs were transfected with

scrambled control siRNA (siCTRL) or Smad3 siRNA (siSMAD3), before incubation with or without TGF- $\beta_1$ ; *SLC2A1* relative mRNA abundance was measured at 24 hours (N=3 biological replicates). **(H)** Confluent pHLFs were pre-incubated with rapamycin (or DMSO control) and exposed to media plus TGF- $\beta_1$  or media alone; *SLC2A1* relative mRNA abundance was measured at 24 hours. **(I)** Confluent pHLFs were transfected with scrambled control siRNA (siCTRL) or PHGDH siRNA (siPHGDH) before incubation with or without TGF- $\beta_1$ ; immunoblotting and densitometric quantification of PHGDH were performed at 24 hours (N=3 biological replicates). Differences between groups were evaluated by unpaired t-test (A-E) or two-way (F-I) ANOVA test with Tukey post-hoc test. \*p<0.05, \*\*p<0.01, \*\*\*p< 0.001, \*\*\*\*p< 0.0001.

## Supplementary Figure 5

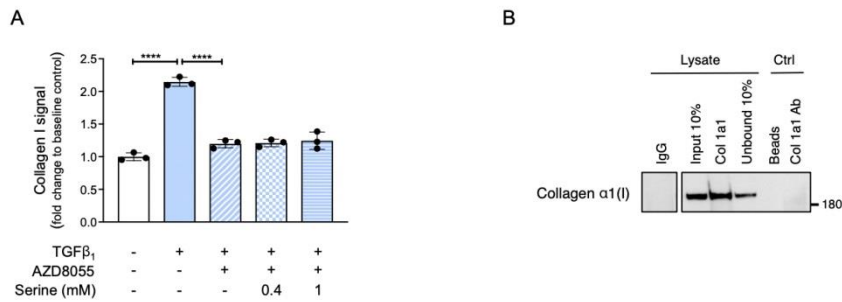

**fig. S5. Exogenous serine does not rescue the inhibitory effects of ATP-competitive mTOR inhibition of TGF-β<sub>1</sub> induced collagen deposition**

(A) Confluent PHLFs were incubated with AZD8055 and supplemented with or without increasing concentration of serine as described, then incubated with or without TGF-β<sub>1</sub>; collagen deposition was assessed by high content imaging at 48 hours. N=3 biological replicates per condition and data are representative of 3 independent experiments. (B) Confluent PHLFs were stimulated with TGF-β<sub>1</sub> prior to cell lysis and immunoprecipitated with antibodies targeting IgG or collagen α1(I), followed by immunoblotting for collagen α1(I) abundance in whole lysate (input), antibody-bound fraction (collagen α1(I) IP) and unbound fraction. Protein G agarose beads and collagen type α1(I) antibody alone were immunoblotted as controls. Differences between groups were evaluated by one-way ANOVA test with Tukey post-hoc test (A). \*= $p < 0.05$ , \*\*= $p < 0.01$ , \*\*\*= $p < 0.001$ , \*\*\*\*= $p < 0.0001$ .



**Table S1. MetaCore pathways enriched in the rapamycin-insensitive, mTOR module**

| <b>Pathway</b>                                                                             | <b>P value</b> | <b>Genes</b>                                            |
|--------------------------------------------------------------------------------------------|----------------|---------------------------------------------------------|
| Glycine, serine, cysteine and threonine metabolism                                         | 5.45E-05       | CBS,GARS,PHGDH,PISD,PSAT1,PSPH,SHMT2                    |
| Signal transduction_mTORC1 downstream signaling                                            | 0.000743439    | CCND2,EIF4A2,EIF4EBP1,GRB10,MTHFD2,POLR3K,SLC2A1,SREBF2 |
| L-Alanine and L-cysteine metabolism                                                        | 0.000942113    | CBS,GOT1,GPT2,PC                                        |
| Translation_Insulin regulation of translation                                              | 0.002325036    | EIF2B3,EIF2S2,EIF2S3,EIF4A2,EIF4EBP1,TSC1               |
| Translation_Translation regulation by Alpha-1 adrenergic receptors                         | 0.004874917    | ADRA1B,EIF4A2,EIF4EBP1,GNB1,GNG11,RHOA                  |
| Tau pathology in Alzheimer disease                                                         | 0.007691877    | GPC1,GRIN2A,MARK1,SDC1,SDC2,TUBA1B,TUBB4B               |
| Hypertrophy of asthmatic airway smooth muscle cells                                        | 0.009638728    | EIF2B3,EIF2S2,EIF2S3,EIF4EBP1,IFNAR2,MAX                |
| Immune response_Distinct metabolic pathways in naive and effector CD8+ T cells             | 0.011569384    | EIF4EBP1,SLC1A5,SLC2A1,SLC7A5,TSC1                      |
| Translation_Opioid receptors in regulation of translation                                  | 0.013771852    | EIF4EBP1,GNB1,GNG11,PENK                                |
| Apoptosis and survival_Endoplasmic reticulum stress response pathway                       | 0.014249639    | BAK1,BCL2L11,EIF2S2,EIF2S3,HERPUD1                      |
| Folic acid metabolism                                                                      | 0.016973265    | ALDH1L2,MTHFD2,SHMT2                                    |
| Stem cells_Excitotoxicity of Glutamate in glioblastoma                                     | 0.017731496    | GNB1,GNG11,GOT1,GRIN2A                                  |
| Regulation of lipid metabolism_Alpha-1 adrenergic receptors signaling via arachidonic acid | 0.018431849    | ADRA1B,GNB1,GNG11,PTGS1,RHOA                            |
| Fenofibrate in treatment of type 2 diabetes and metabolic syndrome X                       | 0.01906206     | ABCA1,ACSL4,RBP4                                        |
| DeltaF508-CFTR traffic / Sorting endosome formation in CF                                  | 0.021286737    | NSF,RAB7A,VPS25                                         |
| Apoptosis and survival_Role of nuclear PI3K in NGF/ TrkA signaling                         | 0.023647542    | ACIN1,BCL2L11,NPM1                                      |
| Role of ER stress in obesity and type 2 diabetes                                           | 0.024016297    | ATF3,PCK2,SREBF2,TRIB3                                  |
| Transcription_HIF-1 targets                                                                | 0.025269769    | ADRA1B,CCNG2,LOXL2,LOXL4,NPM1,SLC2A1                    |
| Cysteine-glutamate metabolism                                                              | 0.027393787    | CBS,GOT1                                                |
| Muscle contraction_S1P2 receptor-mediated smooth muscle contraction                        | 0.031496271    | GNB1,GNG11,MYL7,RHOA                                    |
| Proteolysis_Role of Parkin in the Ubiquitin-Proteasomal Pathway                            | 0.032207644    | PSMD11,SIAH2,TUBA1B,TUBB4B,UBE2G2                       |
| Sulfur metabolism                                                                          | 0.032360777    | CBS,GOT1                                                |
| Apoptosis and survival_Granzyme A signaling                                                | 0.033557078    | ANP32A,APEX1,HIST1H2BD,HIST2H2BE                        |

|                                                          |             |                                         |
|----------------------------------------------------------|-------------|-----------------------------------------|
| Neurophysiological process_Dynein-dynactin motor complex |             |                                         |
| in axonal transport in neurons                           | 0.037276388 | DYNLRB2,IPO5,MAPRE3,RAB7A,TUBA1B,TUBB4B |
| Development_PIP3 signaling in cardiac myocytes           | 0.042916214 | CCND2,EIF4EBP1,GNB1,GNG11,TSC1          |
| Stem cells_Role of GSK3 beta in cardioprotection against |             |                                         |
| myocardial infarction                                    | 0.043951681 | ADM2,BDKRB2,PENK                        |
| Transcription_CoREST complex-mediated epigenetic gene    |             |                                         |
| silencing                                                | 0.045019326 | ELAC2,GRIN2A,SIN3A,SMARCC1              |
| Signal transduction_AKT signaling                        | 0.04754385  | BCL2L11,CCND2,EIF4EBP1,TSC1             |

---

**Table S2. Primer sequence**

|            |                               |
|------------|-------------------------------|
| ATF4 (F)   | 5'-GCTAAGGGCGGGCTCCTCCGA-3'   |
| ATF4 (R)   | 5'-ACCCAACAGGGGCATCCAAGTCG-3' |
| LDHA (F)   | 5'-GGAGATTCCAGTGTGCCTGT-3'    |
| LDHA (R)   | 5'-GTCCAATAGCCCAGGATGTG-3'    |
| PFKFB3 (F) | 5'-AAAAGTGTTCAACGTCGGGG-3'    |
| PFKFB3 (R) | 5'-CATGGCTTCCTCATTGTCGG-3'    |
| PHGDH (F)  | 5'-GGAGGAGATCTGGCCTCTCT-3'    |
| PHGDH (R)  | 5'-GTCATTCAGCAAGCCTGTCG-3'    |
| PSAT1 (F)  | 5'-GCGGCCATGGAGAAGCTTAG-3'    |
| PSAT1 (R)  | 5'-ATGCCTCCCACAGACACGTA-3'    |
| PSPH (F)   | 5'-GAGGACGCGGTGTCAGAAAT-3'    |
| PSPH (R)   | 5'-GGTTGCTCTGCTATGAGTCTCT-3'  |
| SHMT1 (F)  | 5'-GTGACCACCACACTCACAA-3'     |
| SHMT1 (R)  | 5'-ACAGCAACCCCTTTCCTGTAG-3'   |
| SHMT2 (F)  | 5'-GCTGCCCTAGACCAGAGTTG-3'    |
| SHMT2 (R)  | 5'-GCAGAGGCCGAGCCG-3'         |
| SLC2A1 (F) | 5'-ACTGTCGTGTCGCTGTTTGT-3'    |
| SLC2A1 (R) | 5'-GATGGCCACGATGCTCAGAT-3'    |
